# Supplementary material
Source: PubMed Central journal article supplement (PMC2956945)
Supplement: tjp0588-3063-SD1.pdf [file tjp0588-3063-SD1.pdf]

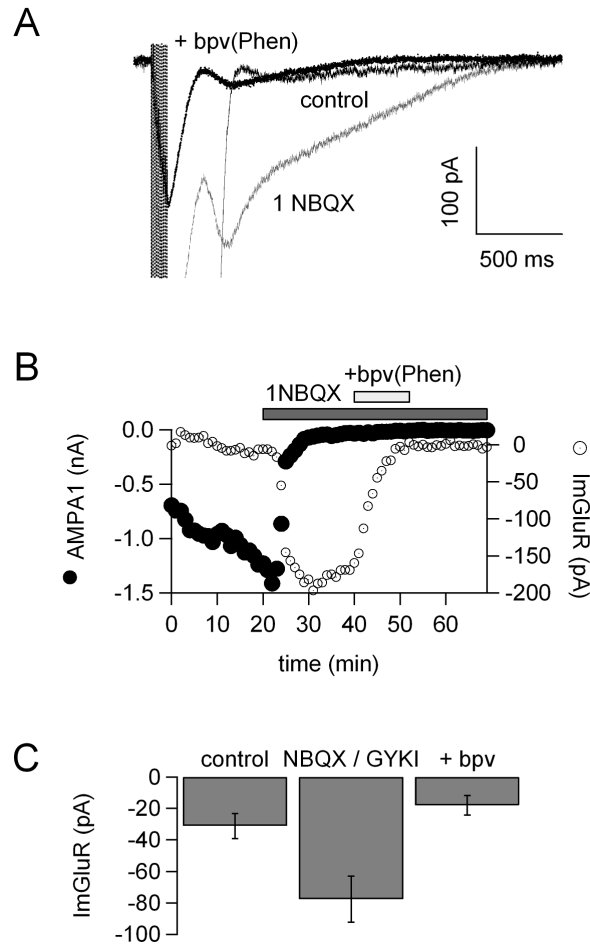

**Figure S1: The tyrosine Phosphatase inhibitor bpv(Phen) inhibits the mGluR sEPSC.** A, average of 5 postsynaptic currents following burst stimulation (10 at 100Hz) in control, 1 $\mu$ M NBQX and NBQX plus 100 $\mu$ M bpv(Phen). Following the application of 1 $\mu$ M NBQX the amplitude of the mGluR sEPSC increased from -9.8pA to -185.5pA and was subsequently blocked by bath application of 100 $\mu$ M bpv(Phen). B, amplitude plot of the first AMPA response (AMPA1, black dots) in the train and the mGluR sEPSC (empty dots). Bars indicate time of application of NBQX and bpv(Phen). C, bar graph of average amplitude  $\pm$  sem of mGluR sEPSC in control, 1 $\mu$ M NBQX or 5 $\mu$ M GYKI and 100 $\mu$ M bpv(Phen). Block in the presence of NBQX or GYKI was not different and data were pooled together.
